# Supplementary material for: Exploring the Language Used to Describe Older Patients at Multidisciplinary Cancer Conferences
Source: MDPI journal article supplement (doi:10.3390/cancers16081477), 2024-04-12
Supplement: s1 [file s1]

**Supplementary Table S1: Presentation of frailty-related descriptors and GA domains by MCC site**

| <b>Variable</b>                                     | <b>Site A</b> | <b>Site B</b> | <b>Site C</b> | <b>Site D</b> | <b>Chi-square <i>p</i>-value</b> |
|-----------------------------------------------------|---------------|---------------|---------------|---------------|----------------------------------|
| <b>Frailty or Fitness, %</b>                        | 26.7          | 11.1          | 26.3          | 15.8          | 0.616                            |
| <b>Age, %</b>                                       | 53.3          | 11.1          | 36.8          | 36.8          | 0.072                            |
| <b>Overall health, %</b>                            | 13.3          | 11.1          | 15.8          | 42.1          | 0.112                            |
| <b>Performance status, %</b>                        | 6.7           | 11.1          | 0             | 26.3          | 0.069                            |
| <b>Treatment tolerance, %</b>                       | 40            | 22.2          | 15.8          | 47.4          | 0.139                            |
| <b>GA domains, <math>\geq 2</math> mentioned, %</b> | 13.3          | 83.3          | 5.3           | 21.1          | <b>&lt;0.001</b>                 |

Note: “GA” = Geriatric Assessment, “MCC” = Multidisciplinary Cancer Conference, “GI” = Gastrointestinal, “GU” = Genitourinary.

Note: Fisher-Freeman-Halton Exact Test was used instead of Pearson Chi-Square, where applicable, due to low counts.

**Supplementary Table S2: Presentation of frailty-related descriptors and GA domains by presenter specialty**

| Variable                                | Medical<br>Oncology<br>(n=22) | Radiation<br>Oncology<br>(n=7) | Surgical<br>Oncology<br>(n = 44) | Chi-square<br><i>p</i> -value |
|-----------------------------------------|-------------------------------|--------------------------------|----------------------------------|-------------------------------|
| <b>Frailty or Fitness, n (%)</b>        | 5 (22.7)                      | 2 (28.6)                       | 7 (15.9)                         | 0.605                         |
| <b>Age, n (%)</b>                       | 8 (36.4)                      | 3 (42.9)                       | 15 (34.1)                        | 0.935                         |
| <b>Overall health, n (%)</b>            | 3 (13.6)                      | 2 (28.6)                       | 11 (25.0)                        | 0.569                         |
| <b>Performance status, n (%)</b>        | 6 (27.2)                      | 0 (0)                          | 2 (4.5)                          | <b>0.019</b>                  |
| <b>Treatment tolerance, n (%)</b>       | 5 (22.7)                      | 4 (57.1)                       | 15 (34.1)                        | 0.246                         |
| <b>GA domains, ≥ 2 mentioned, n (%)</b> | 5 (22.7)                      | 0 (0)                          | 17 (38.6)                        | 0.085                         |

Note: “GA” = Geriatric Assessment.

Note: Fisher-Freeman-Halton Exact Test was used instead of Pearson Chi-Square, where applicable, due to low counts.

**Supplementary Table S3: Presentation of frailty-related descriptors and GA domains by presenter training level**

| <b>Variable</b>                                         | <b>Trainee<br/>(n=33)</b> | <b>Faculty<br/>(n=40)</b> | <b>Chi-square<br/><i>p</i>-value</b> |
|---------------------------------------------------------|---------------------------|---------------------------|--------------------------------------|
| <b>Frailty or Fitness, n (%)</b>                        | 7 (21.2)                  | 7 (17.5)                  | 0.770                                |
| <b>Age, n (%)</b>                                       | 6 (18.2)                  | 18 (45.0)                 | <b>0.024</b>                         |
| <b>Overall health, n (%)</b>                            | 7 (21.2)                  | 9 (22.5)                  | 1.000                                |
| <b>Performance status, n (%)</b>                        | 7 (21.2)                  | 1 (2.5)                   | <b>0.019</b>                         |
| <b>Treatment tolerance, n (%)</b>                       | 9 (27.3)                  | 12 (30.0)                 | 1.000                                |
| <b>GA domains, <math>\geq 2</math> mentioned, n (%)</b> | 18 (54.5)                 | 6 (15.0)                  | <b>&lt;0.001</b>                     |

Note: “GA” = Geriatric Assessment.

Note: Fisher’s Exact Test was used instead of Pearson Chi-Square, where applicable, due to low counts.
